# Supplementary material for: Kinetic Estimated Glomerular Filtration Rate in Predicting Paediatric Acute Kidney Disease
Source: MDPI journal article supplement (doi:10.3390/jcm12196314), 2023-09-30
Supplement: s1 [file s1]

**Supplementary Table S1.** Logistic regression with AKD and MAKE30 dependant variable with KeGFR<sub>1</sub> stages.

| Parameter                 | AKD                 | AKD adjusted        | MAKE30             | MAKE30 adjusted   |
|---------------------------|---------------------|---------------------|--------------------|-------------------|
| KGFR <sub>1</sub> stage 1 | Baseline            | Baseline            | Baseline           | Baseline          |
| KGFR <sub>1</sub> stage 2 | -                   | -                   | -                  | -                 |
| KGFR <sub>1</sub> stage 3 | 2.76 (1.64-4.64)    | 3.07 (1.74-5.39)    | -                  | -                 |
| KGFR <sub>1</sub> stage 4 | 5.33 (3.44-8.28)    | 6.56 (3.92-10.98)   | -                  | -                 |
| KGFR <sub>1</sub> stage 5 | 27.23 (15.11-49.07) | 28.07 (14.23-55.34) | 10.42 (6.41-16.93) | 7.77 (4.53-13.32) |
| Nagelkerke R <sup>2</sup> | 0.27                | 0.32                | 0.18               | 0.23              |
| AUC                       | 0.763               | 0.801               | 0.675              | 0.764             |

Legend: Adjusted for: sex, AKI stage, AKI cause; AKD=acute kidney disease; MAKE30=major adverse kidney events in the first 30 days; KeGFR=kinetic estimated glomerular filtration rate; AUC=area under the curve.

**Supplementary Table S2.** Logistic regression with AKD and MAKE30 dependant variable with KeGFR<sub>2</sub> stages.

| Parameter                 | AKD                  | AKD adjusted         | MAKE30               | MAKE30 adjusted      |
|---------------------------|----------------------|----------------------|----------------------|----------------------|
| KGFR <sub>2</sub> stage 1 | Baseline             | Baseline             | Baseline             | Baseline             |
| KGFR <sub>2</sub> stage 2 | 2.65 (1.18-5.94)     | 2.79 (1.23-6.33)     | -                    | -                    |
| KGFR <sub>2</sub> stage 3 | 3.03 (1.53-6)        | 3.58 (1.76-7.29)     | 2.8 (1.1-7.09)       | 4.23 (1.56-15.02)    |
| KGFR <sub>2</sub> stage 4 | 28.72 (10.46-78.85)  | 32.75 (11.7-91.68)   | 4.48 (1.86-10.81)    | 5.89 (2.31-15.02)    |
| KGFR <sub>2</sub> stage 5 | 70.09 (16.04-306.29) | 80.14 (18.08-355.11) | 43.17 (17.21-108.26) | 69.42 (24.84-193.97) |
| Nagelkerke R <sup>2</sup> | 0.43                 | 0.44                 | 0.37                 | 0.43                 |
| AUC                       | 0.809                | 0.827                | 0.809                | 0.837                |

Legend: Adjusted for: sex, AKI stage, AKI cause; AKD=acute kidney disease; MAKE30=major adverse kidney events in the first 30 days; KeGFR=kinetic estimated glomerular filtration rate; AUC=area under the curve.
